# Supplementary material
Source: Springer Nature journal article supplement (https://www.springermedizin.de/resource/supplementary/12916_2013_850_MOESM6_ESM.pdf/9598472)

Cumulative number of H7N9 influenza cases

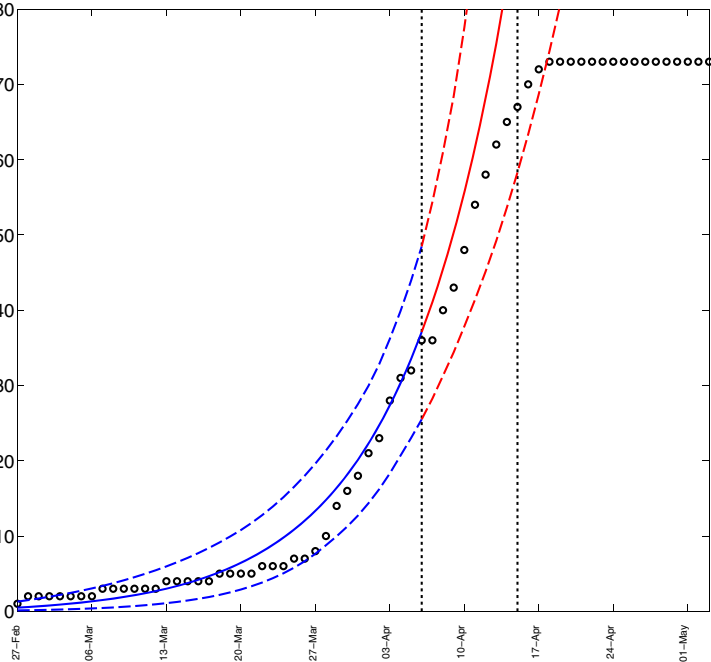

Supplement: MOESM6 [file 9598472]
